# Supplementary material for: The Drosophila orthologue of the primary ciliary dyskinesia-associated gene, DNAAF3, is required for axonemal dynein assembly
Source: PubMed Central journal article supplement (PMC8565470; doi:10.1242/bio.058812), 2021-10-28
Supplement: biolopen-10-058812-s1.pdf [file biolopen-10-058812-s1.pdf]

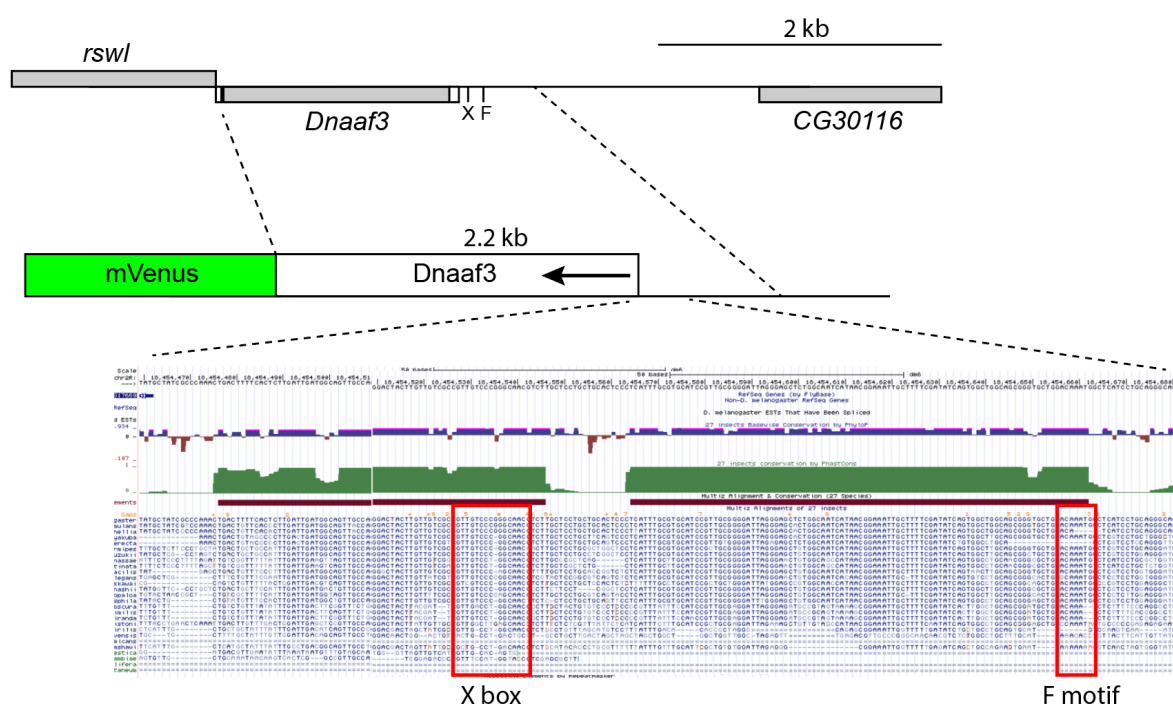

**Fig. S1.** *Dnaaf3-mVenus* fusion gene was designed to include the X box (consensus nucleotide sequence RYYRYYN(1–3)RRNRAC) (Laurençon et al., 2007) and Forkhead binding motif (F motif) (consensus nucleotide sequence RYMAAYA) (Newton et al., 2012) motifs in the upstream regulatory region to keep the spatial-temporal pattern of the expression from its own promoter.

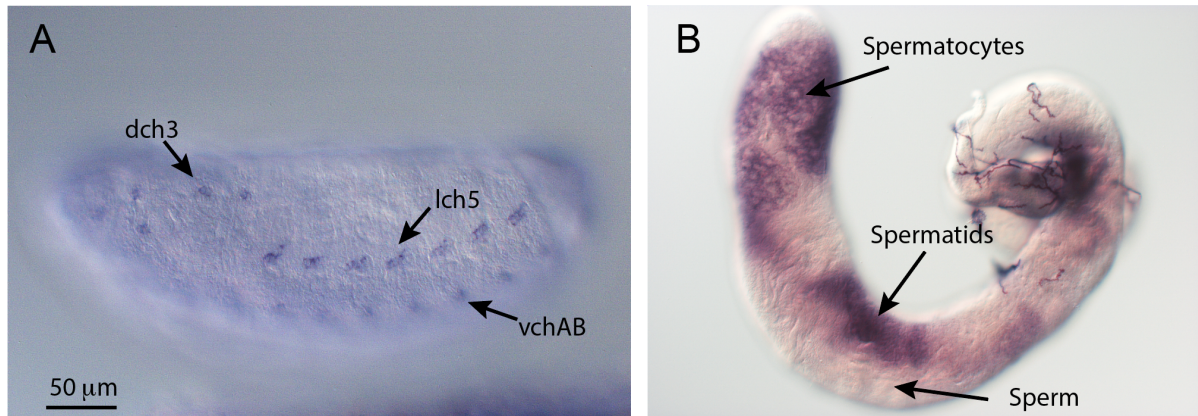

**Fig. S2.** *Dnaaf3* mRNA expression. (A) Stage 16 embryo. Expression is observed in the segmentally repeated locations expected for larval Ch neurons (see Fig. 1B). (B) Adult testis. The large nuclei identify the expressing cells near the tip as spermatocytes. Expression further along is likely to be in differentiating spermatids. No expression is seen in mature sperm.

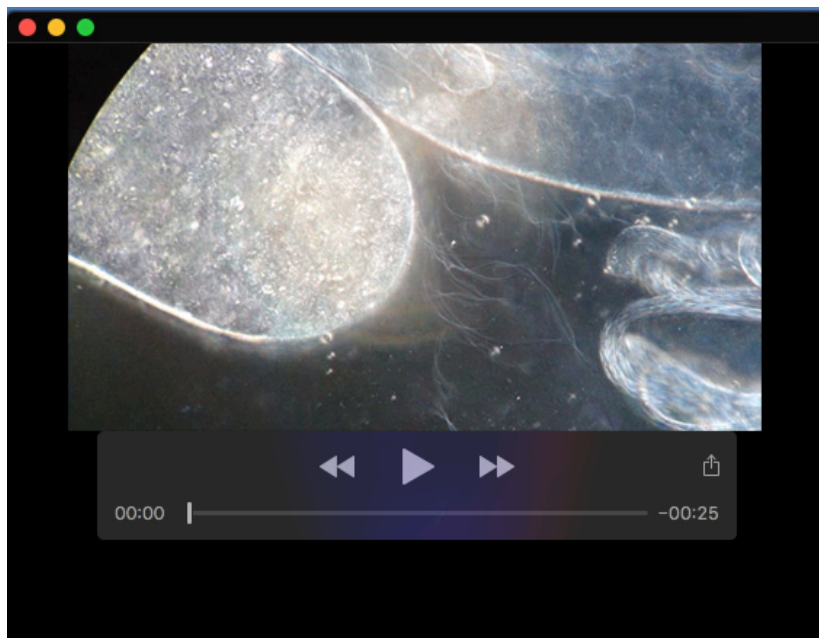

**Movie 1.** Sperm from *BamGal4* fly (control for RNAi)

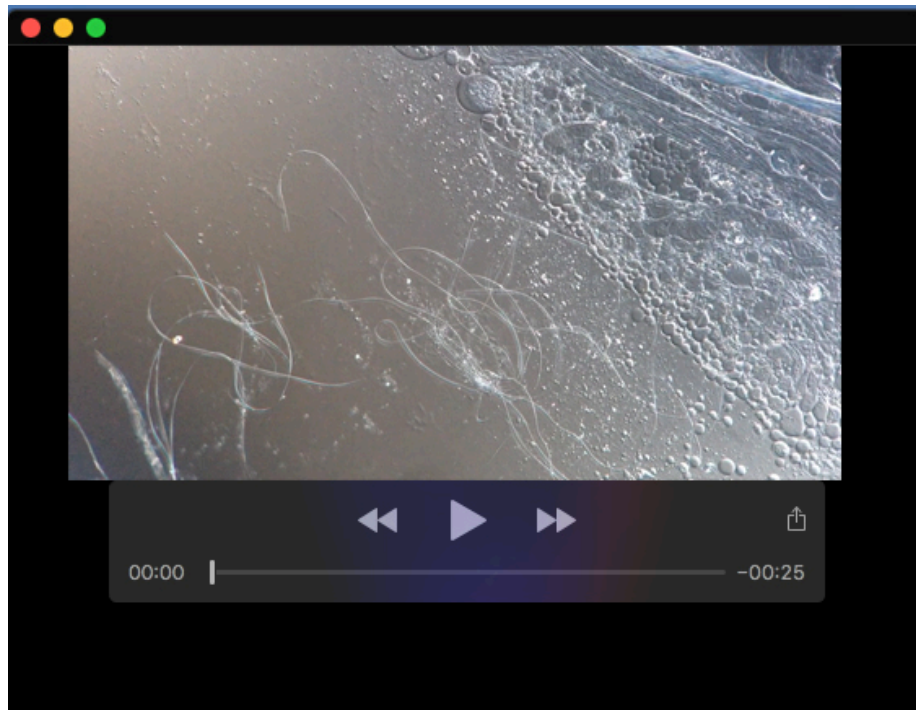

**Movie 2.** Sperm from *BamGal4; UAS-Dnaaf3* RNAi fly (*Dnaaf3* knockdown)

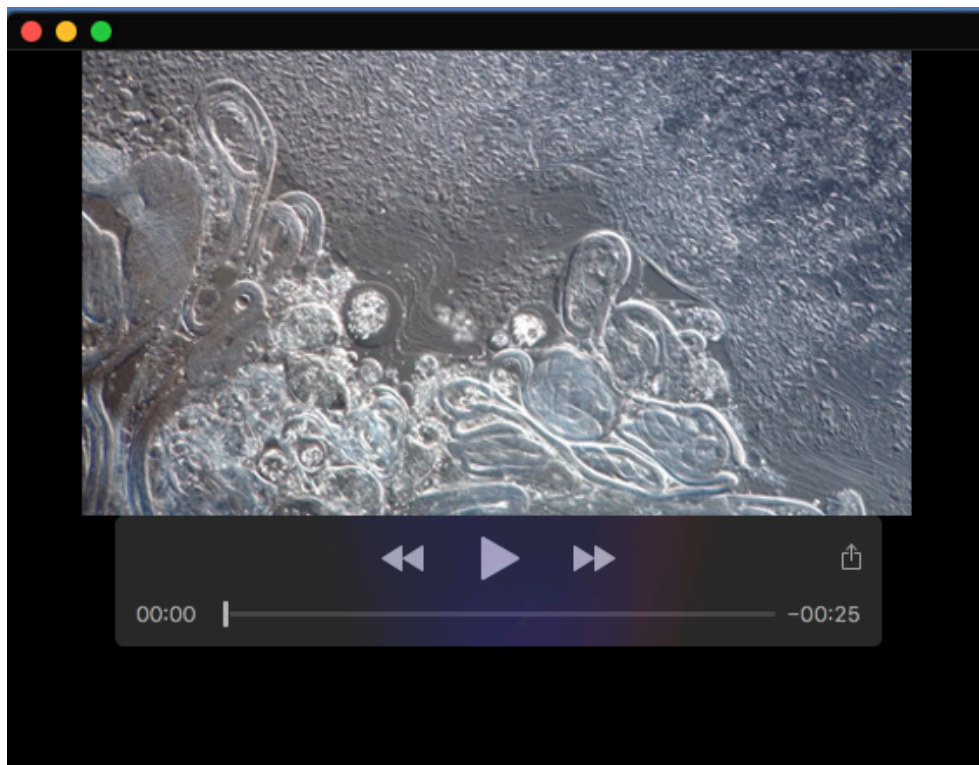

**Movie 3.** Sperm from *Dnaaf3*<sup>4CR</sup> homozygote

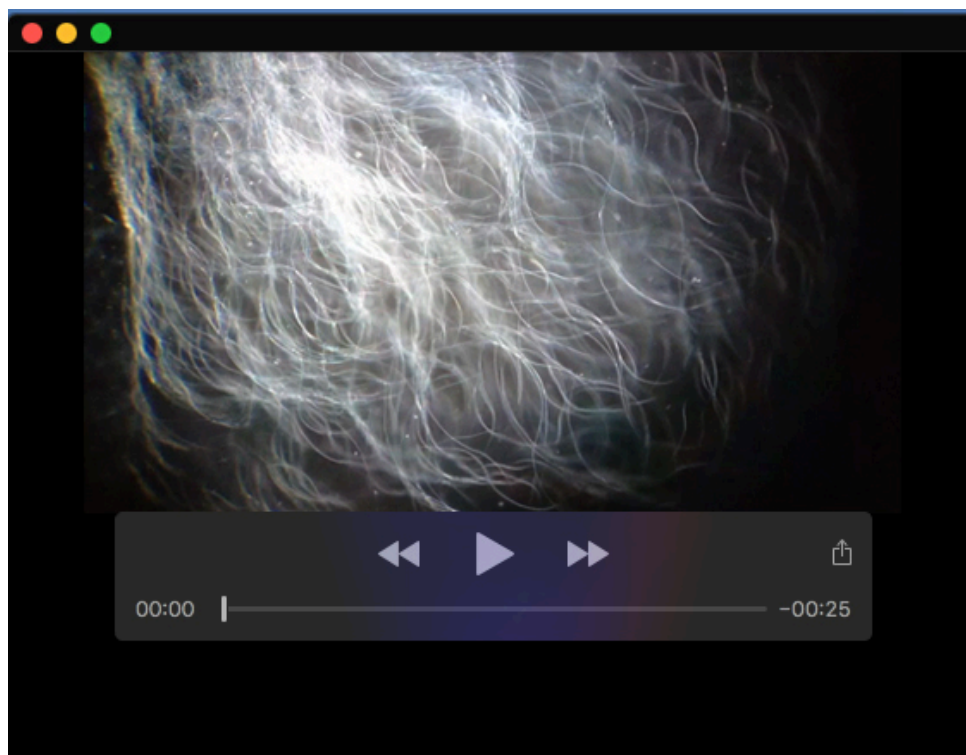

**Movie 4.** Sperm from *Dnaaf3*<sup>4CR</sup> homozygote with *Dnaaf3-mVenus* fusion gene (mutant rescue)

**Table S1. Ciliary motility proteins detected in adult testes, sorted by abundance**

| Majority protein IDs | Gene names            | Average LFQ control* | Average LFQ CG17669* | -log <sub>2</sub> ratio | -log <sub>10</sub> p value |
|----------------------|-----------------------|----------------------|----------------------|-------------------------|----------------------------|
| Q9VH07               | pont                  | 9.87783848           | 9.62517004           | 0.037383                | 0.032098                   |
| Q8INT5               | Dnaaf1                | 9.14370354           | 11.50210626          | -0.33105                | 0.265354                   |
| Q5LJN5               | kl-5                  | 8.19193092           | 2.814315855          | 1.541419                | 2.208549                   |
| Q9V3K3               | rept                  | 7.88284253           | 8.65178034           | -0.13428                | 0.235542                   |
| Q9V3M9               | Tektin-A              | 7.25402673           | 2.979805372          | 1.283564                | 1.186591                   |
| A8Y5B7               | kl-3                  | 6.80093659           | 0.430428367          | 3.981888                | 3.182219                   |
| Q9VBA1               | Spag1                 | 6.39372796           | 6.470997003          | -0.01733                | 0.011752                   |
| Q9VU41               | Zmynd10               | 5.59104156           | 7.163702465          | -0.35759                | 0.363388                   |
| Q9W1V2               | CG3085                | 4.91455102           | 1.939847136          | 1.341117                | 1.576174                   |
| Q9VGG6               | Dnali1                | 3.88414271           | 1.440937117          | 1.430589                | 1.638454                   |
| Q9VGC1               | CG10014               | 3.6990868            | 2.098445308          | 0.817848                | 0.688281                   |
| Q9V3E9               | Rpap3                 | 3.05702371           | 3.072928769          | -0.00749                | 0.0058                     |
| Q9W1D3               | Rsph4a                | 3.04296406           | 2.084000363          | 0.546122                | 0.926048                   |
| Q9VJC6               | Dhc36C                | 2.82836711           | 0.163285342          | 4.114502                | 2.494444                   |
| Q8T3Z0               | Tektin-C              | 2.44201942           | 1.224471976          | 0.995915                | 1.457508                   |
| Q8INF7               | Heatr2                | 2.35414183           | 2.489974686          | -0.08093                | 0.169468                   |
| Q9VT21               | CG8336                | 2.33143917           | 2.505177094          | -0.10369                | 0.116157                   |
| Q9VAV5               | Dhc98D                | 1.83012501           | 0.712779034          | 1.360415                | 2.116203                   |
| Q9VM21               | gudu                  | 1.62031671           | 0.232234203          | 2.802623                | 2.02667                    |
| Q9VUG3               | Pih1D3                | 1.57346805           | 1.741292636          | -0.14621                | 0.1014                     |
| Q9VZH1               | CG18675               | 1.47753788           | 1.76610829           | -0.25738                | 0.309647                   |
| Q9VN57               | CG17387               | 1.41627716           | 1.324956294          | 0.096159                | 0.070752                   |
| Q24117               | ctp                   | 1.36907896           | 1.078564964          | 0.344093                | 0.207812                   |
| Q9VK29               | Rsph1                 | 1.35813245           | 0.991262186          | 0.454286                | 0.621901                   |
| <b>A1ZB91</b>        | <b>CG17669/Dnaaf3</b> | <b>1.2915202</b>     | <b>0.081774953</b>   | <b>3.981267</b>         | <b>3.103016</b>            |
| Q0E8T7               | CG34124               | 1.18667573           | 0.490089781          | 1.275808                | 2.25354                    |
| Q8T415               | Centrin               | 1.16685798           | 0.984236486          | 0.245552                | 0.207075                   |
| Q9VYR5               | CG18130               | 1.10884709           | 0.581556947          | 0.931068                | 0.909879                   |
| Q9VZ77               | Dnah3                 | 1.08739055           | 0.119223228          | 3.189133                | 2.309416                   |
| Q9VCN4               | Ccdc114               | 1.08124333           | 0.208368775          | 2.37548                 | 1.746445                   |

|            |          |            |             |          |          |
|------------|----------|------------|-------------|----------|----------|
| Q94524     | Dlc90F   | 1.08013754 | 0.998358295 | 0.113585 | 0.088463 |
| Q8MT08     | Gas8     | 1.05840147 | 0.268884548 | 1.976828 | 1.168448 |
| Q9VWZ3     | Dhc16F   | 1.01829888 | 0.041609539 | 4.613103 | 3.265697 |
| Q7KVA7     | Dhc62B   | 1.00184398 | 0.157084244 | 2.673047 | 2.321502 |
| Q9VRY7     | CG10099  | 0.91960338 | 0.606549278 | 0.600387 | 0.664016 |
| Q8T3V7     | Rsph9    | 0.86288384 | 0.617610339 | 0.482469 | 0.659223 |
| Q9VC34     | CG6980   | 0.83779304 | 1.043301876 | -0.31649 | 0.301679 |
| Q5LJP0     | kl-2     | 0.78943234 | 0.224258622 | 1.815652 | 2.822993 |
| A0A0B7P7M6 | l(2)41Ab | 0.76685658 | 0.609264688 | 0.331888 | 0.30116  |
| Q9VS90     | Wdr63    | 0.76016435 | 0.510863279 | 0.573374 | 1.099499 |
| Q9VJY4     | Dnai2    | 0.67582694 | 0.303152945 | 1.156608 | 1.965192 |
| Q9VA28     | CG15547  | 0.55961706 | 0.304514523 | 0.877929 | 0.757275 |
| Q9VU57     | Cfap43   | 0.55106365 | 0.068451057 | 3.009074 | 2.674799 |
| Q0E9G3     | Dnaaf2   | 0.47060279 | 0.581374511 | -0.30496 | 0.22944  |
| Q4V516     | lobo     | 0.4429829  | 0.227454095 | 0.961676 | 1.597102 |
| Q9W3J8     | CG10958  | 0.3214128  | 0.131678316 | 1.28741  | 1.370424 |
| Q9VVM7     | Wdr92    | 0.27889713 | 0.453183439 | -0.70036 | 1.994956 |
| Q9W0F0     | robl62A  | 0.25048477 | 0.039268251 | 2.673288 | 1.774009 |
| Q4QPW2     | CG10822  | 0.23635937 | 0.124063924 | 0.929898 | 0.591768 |
| Q9W0U9     | Dic61B   | 0.22810593 | 0.14967333  | 0.607887 | 1.814405 |
| A1Z8T9     | CG8407   | 0.21119504 | 0.090270929 | 1.226243 | 0.634525 |
| Q7KMS3     | robl     | 0.17293244 | 0.22301487  | -0.36693 | 0.193481 |
| Q0KI05     | Dnah9    | 0.15915179 | 0.020345612 | 2.967614 | 0.376532 |
| Q9W2A3     | CG13501  | 0.13118274 | 0.07513098  | 0.804098 | 1.408852 |
| Q9W168     | CG16837  | 0.06873574 | 0.028035895 | 1.293785 | 1.453004 |
| Q9VKJ5     | Dyx1c1   | 0.05987797 | 0.20546445  | -1.77879 | 2.303495 |
| Q9V9P1     | CG10834  | 0.04958531 | 5.00819E-10 |          |          |
| Q7K4X4     | Cfap53   | 0.04266028 | 0.11420404  | -1.42065 | 0.929194 |
| Q9VIY1     | CG10750  | 0.03495738 | 0.007402311 | 2.23955  | 1.554517 |
| Q9VK58     | Pih1D1   | 0.03250981 | 0.03428731  | -0.0768  | 0.097999 |
| Q9W3L0     | Dnai2    | 0.02907692 | 0.004135815 | 2.813631 | 0.631246 |
| Q9VQA6     | robl22E  | 0.02688946 | 0.036787338 | -0.45217 | 0.136057 |
| Q9VR52     | Lrrc6    | 0.02411973 | 0.09266751  | -1.94185 | 1.793124 |

|            |          |                   |                    |          |          |
|------------|----------|-------------------|--------------------|----------|----------|
| Q7KUM9     | CG7276   | 0.01382293        | 0.005903806        | 1.227346 | 0.44837  |
| A1Z8V5     | lqcd     | 0.01227507        | 0.001742399        | 2.816585 | 1.135211 |
| A0A0B4LH20 | CG9492   | 0.00647783        | 0.006053899        | 0.097646 | 0.016186 |
| Q4V5H1     | CG17266  | 0.0048374         | 0.007403708        | -0.61402 | 0.278398 |
| Q9VJ18     | robl37BC | 0.00099315        | <i>5.00819E-10</i> |          |          |
| P47947     | TpnC41C  | <i>5.7109E-10</i> | <i>5.00819E-10</i> |          |          |
| A1Z8J9     | CG13202  | <i>5.7109E-10</i> | 0.017887853        |          |          |
| A8JUM9     | Casc1    | <i>5.7109E-10</i> | <i>5.00819E-10</i> |          |          |
| Q9VJC5     | Maats1   | <i>5.7109E-10</i> | <i>5.00819E-10</i> |          |          |

\* italics represent imputed values. Proteins in red were excluded from further analysis due to very low detection level (average LFQ in control <0.05).
